# Supplementary material
Source: PubMed Central journal article supplement (PMC5734048)

## Supplemental materials

### Supplemental figures

#### **Fig. S1. Number of ArgD<sup>+</sup> colonies that harbored a donor marker at the given position.**

Two continuous donor SNPs were considered as one donor marker. For example, two donor markers at the position nt 14 and 15 were defined as one donor marker, then we used nt 14.5 to represent its nucleotide position for plotting. The 380-bp donor DNA corresponding to the position [256-261] in the recipient was defined as ‘selectable donor marker’, and was represented at nt 258 (dashed line).

#### **Fig. S2. Schematic of *lacS* gene deletion via the one-step, microhomology-mediated gene inactivation system.**

The non-replicative plasmid pRJW10 was used as a template for PCR amplification to generate *lacS* gene deletion cassettes, in which the *StoargD* marker was flanked by different size of homology (0-40 bp) to the *lacS* gene. The resulting PCR products were purified and highly concentrated, and amount of 1.5 µg DNA was electroporated into the genetic host RJW008, selecting agmatine prototrophic colonies on agmatine-free plates. The colonies were stained with 2 mg/ml X-gal solution to confirm inactivation of the *lacS* gene.

#### **Fig. S3. PCR analysis of ArgD<sup>+</sup> transformants derived from TA5 knockout experiments.**

(A). Genomic context of TA5 module (*M.164\_0621/M164\_0622*) in the genetic host RJW008. *M.164\_0621* is a putative antitoxin-encoding gene and *M164\_0622* is a putative toxin-encoding gene.

(B-D). Ten individual ArgD<sup>+</sup> transformants were analyzed by PCR analysis using three primer sets, i.e. TA5-FlankP-F/R, UR-F/R and *StoargD*-F1/R1 to examine the TA5 loci (B), *argD* locus (C) and existence of *StoargD* marker (D) in the chromosome, respectively. The genomic DNA of genetic host RJW008 or/and wild-type *S. islandicus* M.16.4 was used as a control. L: GeneRuler Express DNA Ladder (Thermo Fisher Scientific, USA).

**Fig. S4. Validation of the one-step, microhomology-mediated gene inactivation system in *S. islandicus* REY15A by deleting *upsAB* genes in the *ups* (UV-inducible pilus of Sulfolobales) operon.**

(A). A graphic representation of the *ups* gene cluster in the genome of *S. islandicus* E235 (derived from the original isolate *S. islandicus* REY15A) before and after gene disruption.

(B). Transformation of *S. islandicus* E235 with the *upsAB* gene deletion cassette. Transformation with a replicative plasmid pSeSd-StoargD was used as a positive control whereas transformation without DNA added was used as a negative control. A total of 1.5 µg of a replicative plasmid or an *upsAB* gene deletion cassette was electroporated into competent cells (50 µl) respectively. Following electroporation, 800 µl of incubation buffer was added and then incubated for 1 h at 76-78°C without shaking. Transformed-cells were plated onto DYU plates lacking agmatine and incubated at 76-78°C for 8-12 days.

(C). PCR verification of *upsAB* deletion mutant. The approximate positions of primer sets *upsAB*-flankP-F/R used to confirm the deletion of *upsAB* were shown in (A), and the expected lengths of DNA bands amplified from the genetic host and *upsAB* mutant were also indicated. L: GeneRuler Express DNA Ladder (Thermo Fisher Scientific, USA).

**Fig. S5. Phase contrast microscopy analysis of *upsAB* deletion mutant.** Cells with (+UV; 75 J/m<sup>2</sup>) or without UV treatment (-UV) were re-cultivated for 6 hours, and then observed with a phase contrast microscope. The genetic host *S. islandicus* E235 was used as positive control. Scale bars correspond to 10 µm.

## Supplemental tables

**Table S1. Nucleotide sequence variations between the donor DNA (*SsoargD*) and the regions surrounding *argD* mutant allele in chromosome of recipient strain RJW008**

| Given nt. position in <i>argD</i><br>deletion locus of the recipient | Recipient | Donor | No. of bp <sup>b</sup> |       |
|----------------------------------------------------------------------|-----------|-------|------------------------|-------|
|                                                                      |           |       | Before                 | After |
| 14                                                                   | G         | T     | 13                     | 0     |
| 15                                                                   | C         | G     | 0                      | 2     |
| 18                                                                   | A         | G     | 2                      | 4     |
| 23                                                                   | T         | C     | 4                      | 16    |
| 40                                                                   | G         | A     | 16                     | 0     |
| 41                                                                   | T         | C     | 0                      | 3     |
| 45                                                                   | C         | T     | 3                      | 20    |
| 66                                                                   | A         | G     | 20                     | 2     |
| 69                                                                   | A         | T     | 2                      | 2     |
| 72                                                                   | T         | G     | 2                      | 26    |
| 99                                                                   | C         | T     | 26                     | 6     |
| 106                                                                  | G         | C     | 6                      | 10    |
| 117                                                                  | G         | A     | 10                     | 10    |
| 128                                                                  | T         | C     | 10                     | 21    |
| 150                                                                  | G         | C     | 21                     | 4     |
| 155                                                                  | T         | A     | 4                      | 54    |
| 210                                                                  | G         | A     | 54                     | 29    |
| 240                                                                  | A         | G     | 29                     | 12    |
| 253                                                                  | A         | G     | 12                     | 2     |
| [256-261] <sup>a</sup>                                               | GTACC+Del | 380   | 2                      | 2     |
| 263                                                                  | T         | C     | 2                      | 15    |
| [278-279]                                                            | 2 gaps    | CT    | 15                     | 4     |
| 283                                                                  | T         | G     | 4                      | 28    |
| 312                                                                  | T         | G     | 28                     | 11    |
| 324                                                                  | A         | 1 gap | 11                     | 4     |
| [328-329]                                                            | 1 gap     | T     | 4                      | 0     |
| 329                                                                  | C         | A     | 0                      | 31    |
| 361                                                                  | T         | C     | 31                     | 8     |
| 370                                                                  | T         | A     | 8                      | 5     |
| 376                                                                  | A         | G     | 5                      | 2     |

a The introduced KpnI site (GGTACC) in RJW008 chromosome has a match (underlined sequence) with that from donor DNA in position nt 255.

b Number of base pairs between the indicated marker and the previous or subsequent marker.

**Table S2. Predicted VapBC toxin-antitoxin (TA) loci in *S. islandicus* M.16.4**

| Given name | Locus tag* | Start position | Stop position |
|------------|------------|----------------|---------------|
|------------|------------|----------------|---------------|

|      |               |         |         |
|------|---------------|---------|---------|
| TA1  | M164_0369 (T) | 317841  | 318194  |
|      | M164_0370 (A) | 318191  | 318418  |
| TA2  | M164_0407 (T) | 345045  | 345440  |
|      | M164_0408 (A) | 345430  | 345672  |
| TA3  | M164_0437 (T) | 373641  | 374003  |
|      | M164_0438 (A) | 374026  | 374247  |
| TA4  | M164_0609 (T) | 549270  | 549683  |
|      | M164_0610 (A) | 549655  | 549867  |
| TA5  | M164_0621 (A) | 557633  | 557887  |
|      | M164_0622 (T) | 557853  | 558227  |
| TA6  | M164_0721 (A) | 667263  | 667499  |
|      | M164_0722 (T) | 667496  | 667915  |
| TA7  | M164_0828 (A) | 770694  | 770924  |
|      | M164_0829 (T) | 770917  | 771303  |
| TA8  | M164_0872 (A) | 821356  | 821580  |
|      | M164_0873 (T) | 821570  | 821962  |
| TA9  | M164_0918 (T) | 875867  | 876265  |
|      | M164_0919 (A) | 876243  | 876479  |
| TA10 | M164_0961 (T) | 909461  | 909871  |
|      | M164_0962 (A) | 909868  | 910113  |
| TA11 | M164_0965 (A) | 912372  | 912599  |
|      | M164_0966 (T) | 912586  | 912975  |
| TA12 | M164_1023 (A) | 962567  | 962803  |
|      | M164_1024 (T) | 962790  | 963206  |
| TA13 | M164_1221 (A) | 1159805 | 1160047 |
|      | M164_1222 (T) | 1160044 | 1160442 |
| TA14 | M164_1587 (A) | 1467837 | 1468076 |
|      | M164_1588 (T) | 1468066 | 1468494 |
| TA15 | M164_2192 (T) | 2011729 | 2012205 |
|      | M164_2193 (A) | 2012168 | 2012467 |
| TA16 | M164_2194 (A) | 2012842 | 2013099 |
|      | M164_2195 (T) | 2013087 | 2013500 |
| TA17 | M164_2232 (A) | 2044555 | 2044782 |
|      | M164_2233 (T) | 2044742 | 2045176 |
| TA18 | M164_2286 (A) | 2093409 | 2093603 |
|      | M164_2287 (T) | 2093584 | 2093988 |
| TA19 | M164_2326 (A) | 2144973 | 2145266 |
|      | M164_2327 (T) | 2145220 | 2145630 |
| TA20 | M164_2407 (T) | 2231329 | 2231766 |
|      | M164_2408 (A) | 2231751 | 2231984 |
| TA21 | M164_2522 (T) | 2340231 | 2340467 |
|      | M164_2523 (A) | 2340630 | 2340815 |
| TA22 | M164_2714 (T) | 2522335 | 2522721 |
|      | M164_2715 (A) | 2522702 | 2522941 |

\* T denotes toxin and A denotes antitoxin.

**Table S3. Predicted length of PCR products amplified from the genetic host (WT) and TA knockout (KO) strains using the primers located outside of TA loci**

| TA loci | Length ( bp) | Disruption part ( bp) | Replacement part ( bp) | Amplicon from WT ( bp) | Amplicon from KO ( bp) |
|---------|--------------|-----------------------|------------------------|------------------------|------------------------|
| TA1     | 578          | 535                   | 740                    | 851                    | 1056                   |
| TA2     | 628          | 550                   | 740                    | 762                    | 952                    |
| TA3     | 607          | 493                   | 740                    | 703                    | 950                    |
| TA4     | 598          | 566                   | 740                    | 962                    | 1136                   |
| TA5     | 595          | 514                   | 740                    | 714                    | 940                    |
| TA6     | 653          | 563                   | 740                    | 744                    | 921                    |
| TA7     | 610          | 538                   | 740                    | 835                    | 1037                   |
| TA8     | 607          | 535                   | 740                    | 793                    | 998                    |
| TA9     | 613          | 520                   | 740                    | 846                    | 1066                   |
| TA10    | 653          | 590                   | 740                    | 684                    | 834                    |
| TA11    | 604          | 514                   | 740                    | 814                    | 1040                   |
| TA12    | 640          | 563                   | 740                    | 829                    | 1006                   |
| TA13    | 638          | 596                   | 740                    | 769                    | 913                    |
| TA14    | 658          | 614                   | 740                    | 825                    | 951                    |
| TA15    | 739          | 622                   | 740                    | 746                    | 864                    |
| TA16    | 659          | 604                   | 740                    | 882                    | 1018                   |
| TA17    | 622          | 581                   | 740                    | 797                    | 956                    |
| TA18    | 580          | 518                   | 740                    | 714                    | 936                    |
| TA19    | 658          | 588                   | 740                    | 911                    | 1063                   |
| TA20    | 656          | 591                   | 740                    | 818                    | 967                    |
| TA21    | 585          | 563                   | 740                    | 810                    | 987                    |
| TA22    | 607          | 542                   | 740                    | 792                    | 990                    |

Figure .S1

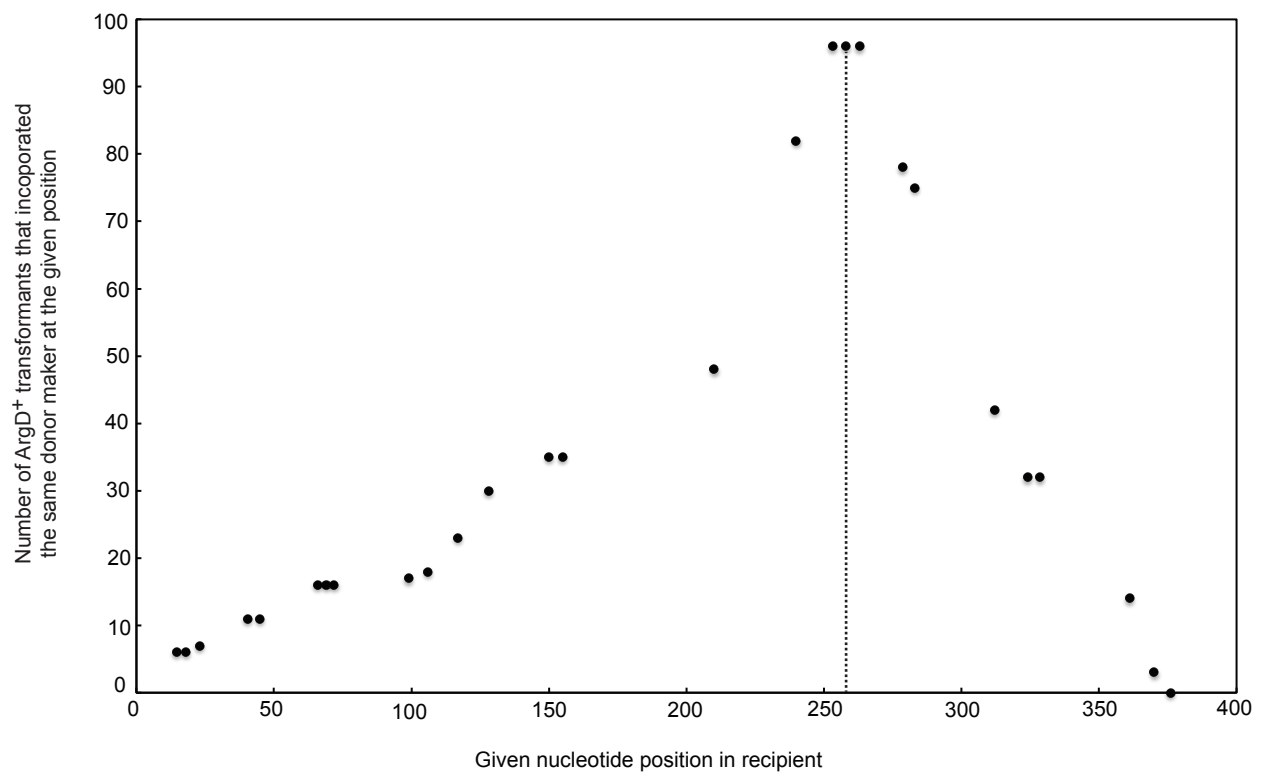

Figure .S2

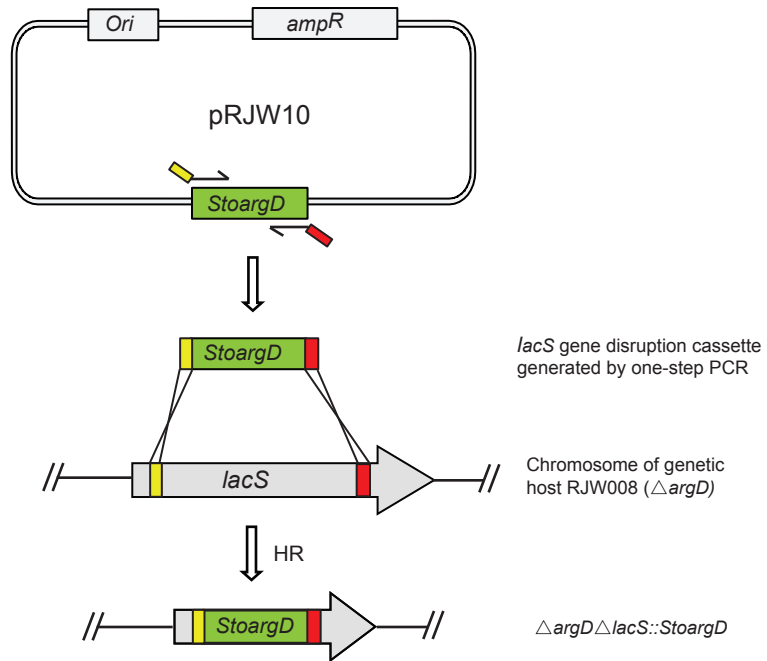

**Figure .S3**

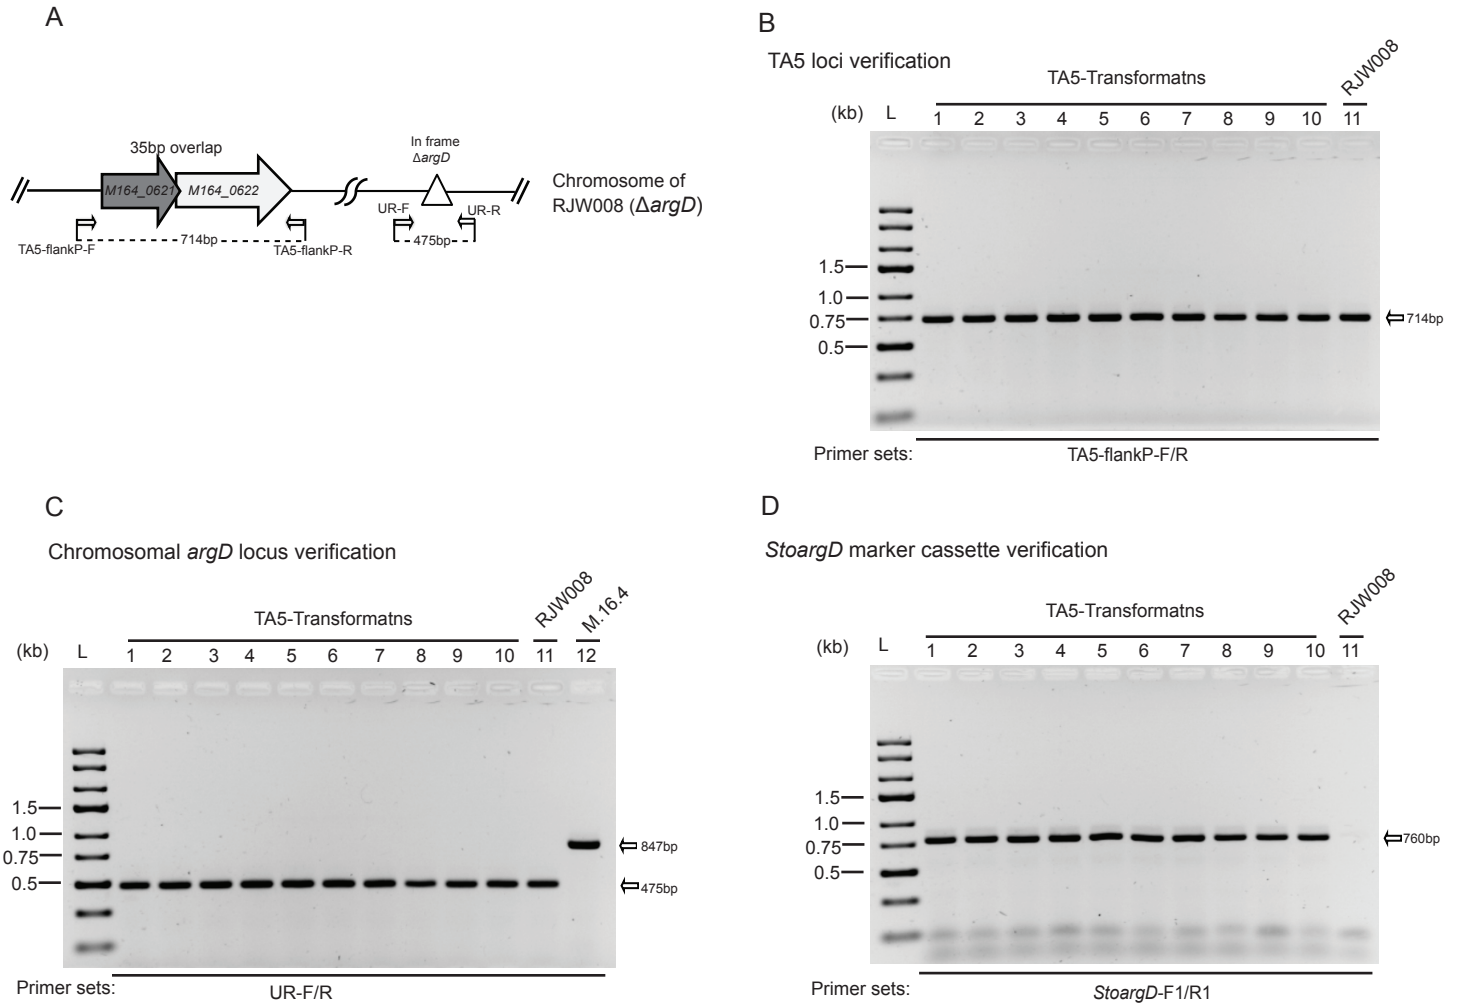



Figure .S4

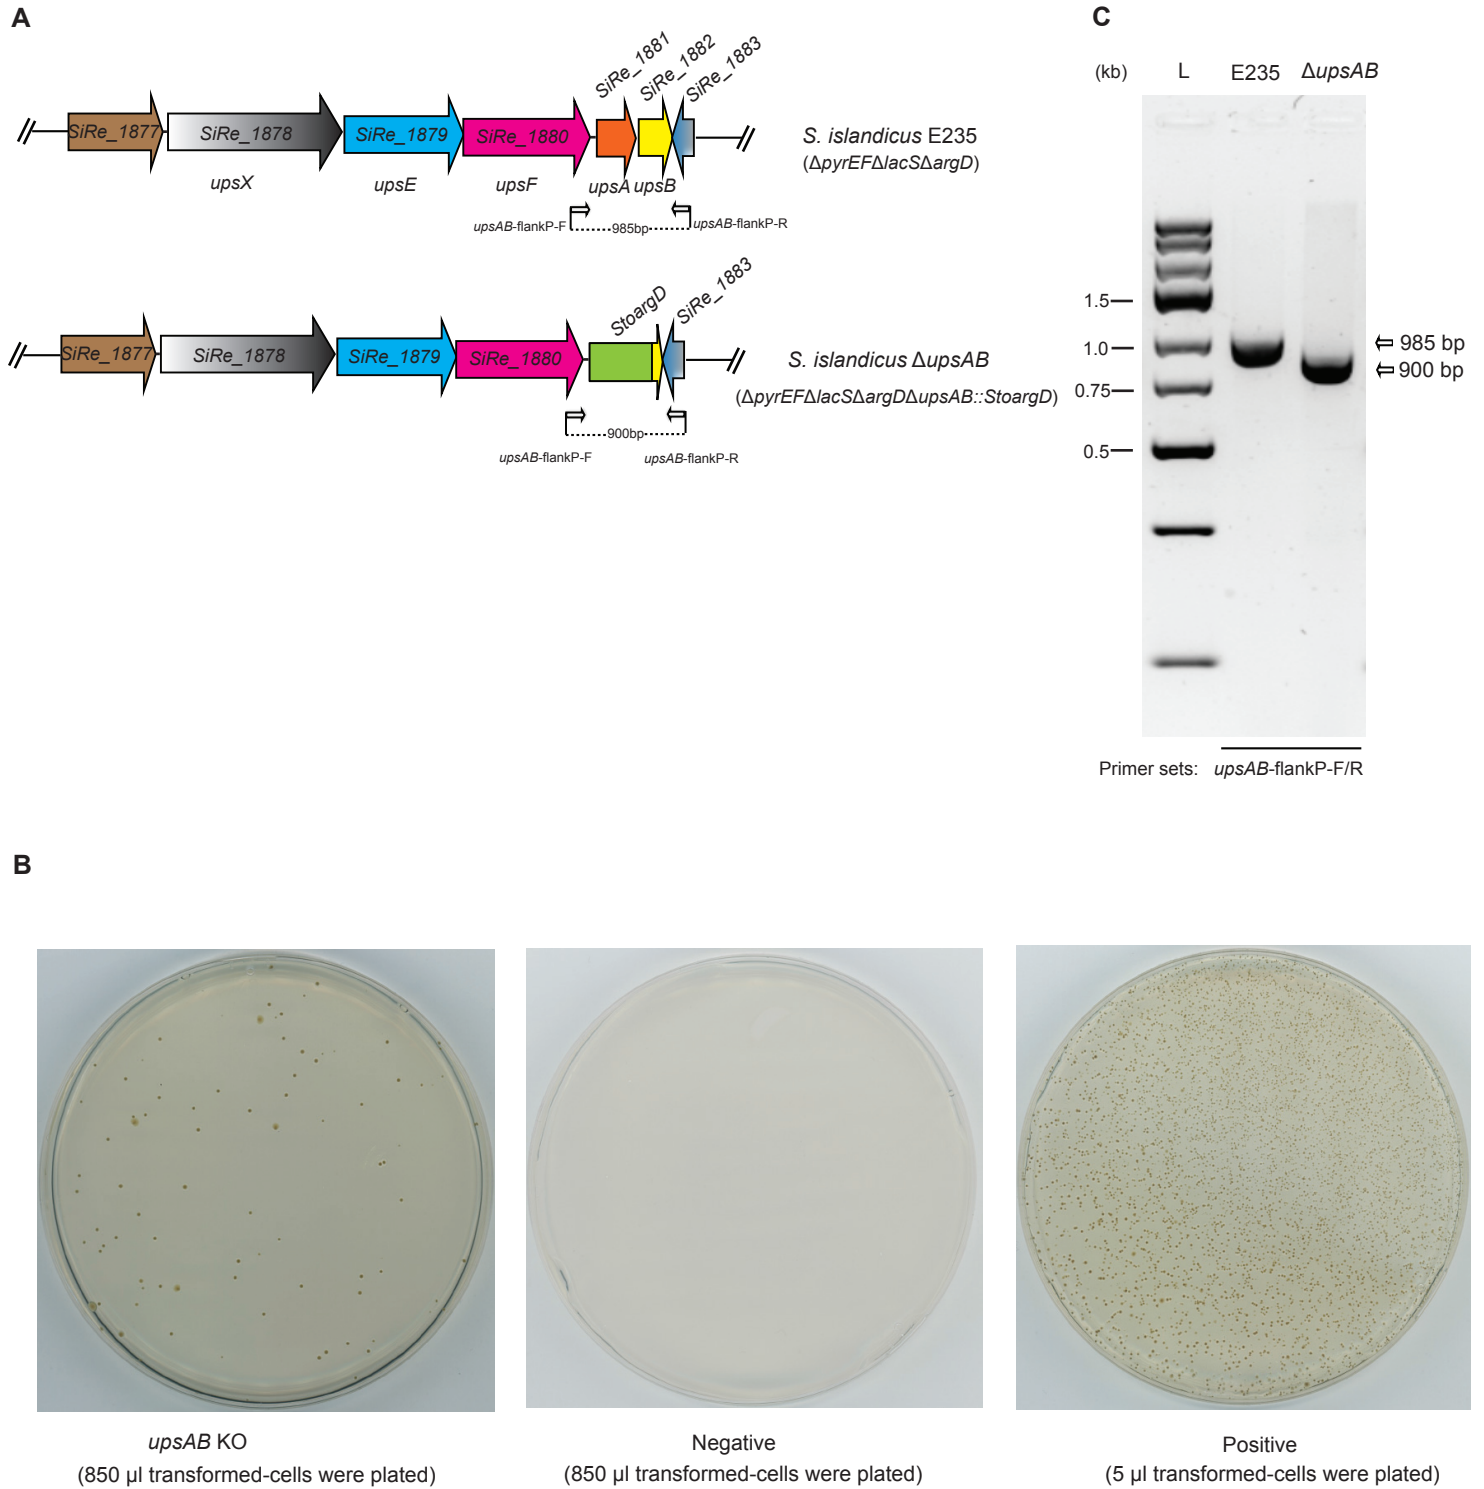

Figure .S5

Without UV treatment

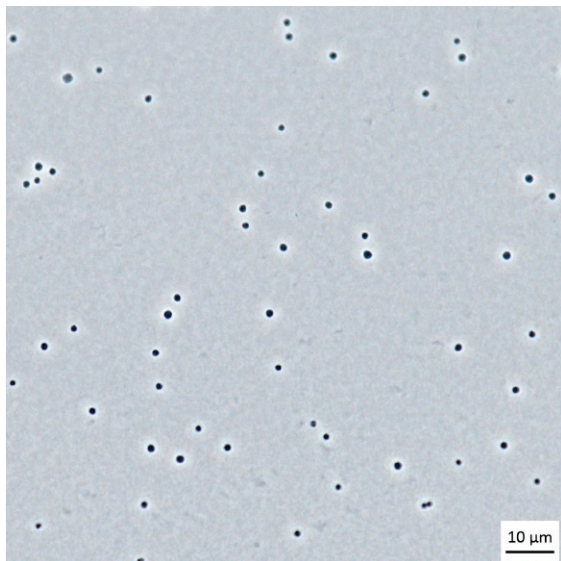

*S. islandicus* E235  
(parental strain)

With UV treatment (75 J/m<sup>2</sup>)

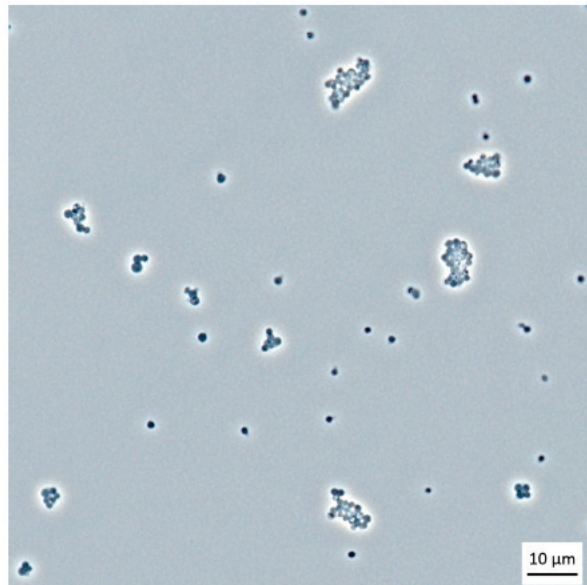

Without UV treatment

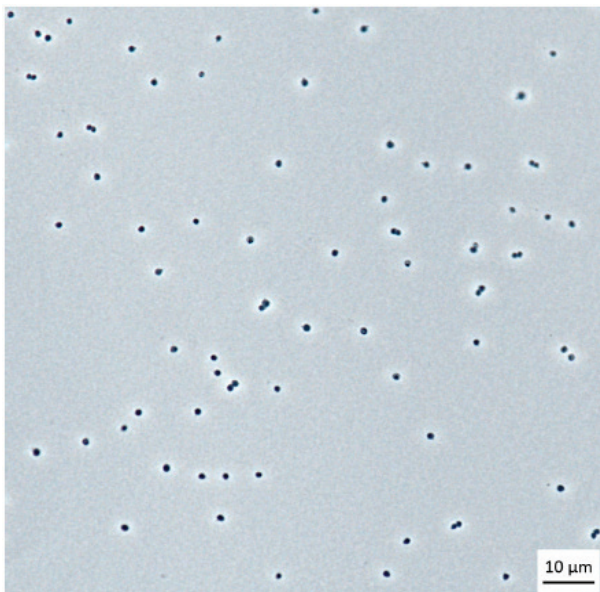

*S. islandicus* Δ*upsAB*

With UV treatment (75 J/m<sup>2</sup>)

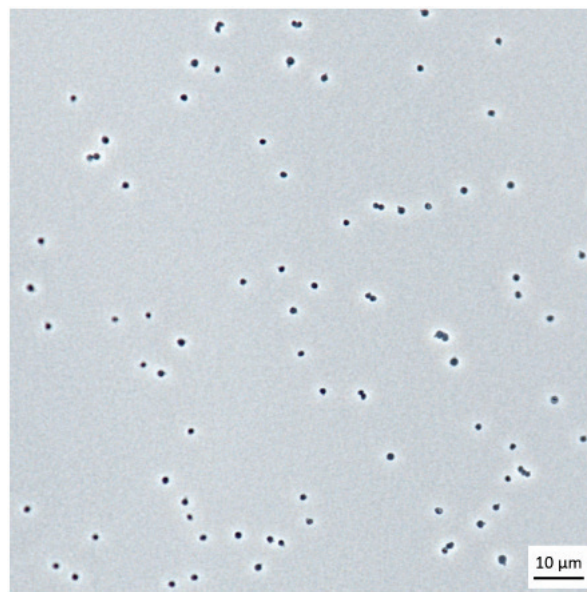

Supplement: AEM.02167-17_zam001188208s1.pdf [file AEM.02167-17_zam001188208s1.pdf]
